# Supplementary material for: Inhibition of SIK2 and SIK3 induces adaptive ER-phagy and creates a therapeutic vulnerability in ovarian cancer
Source: Research Square preprint supplement (doi:10.21203/rs.3.rs-9933879/v1), 2026-07-01

Fig 1G

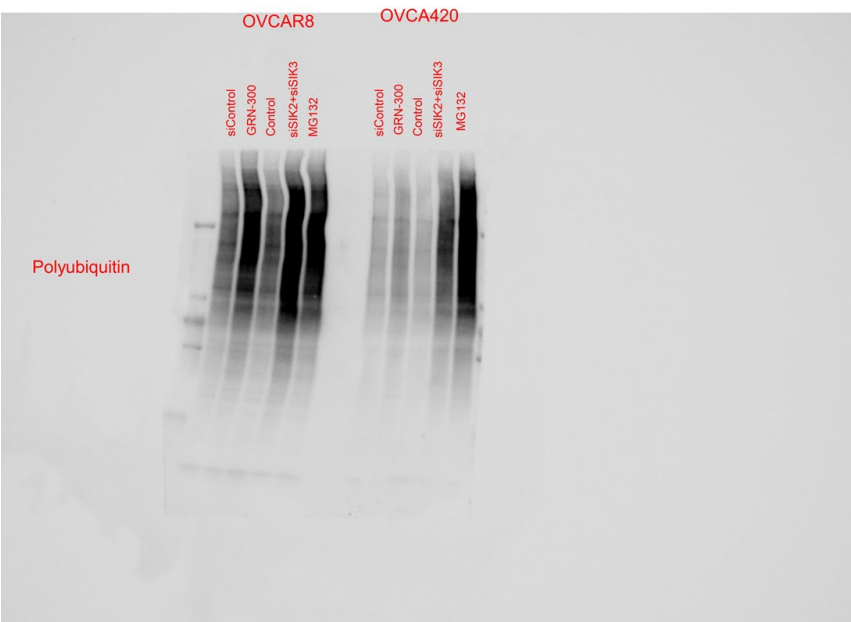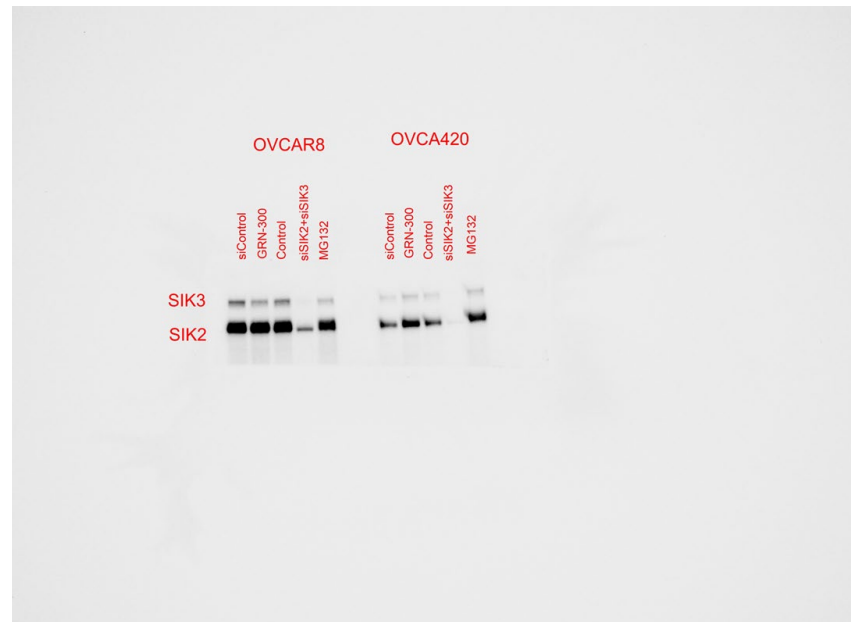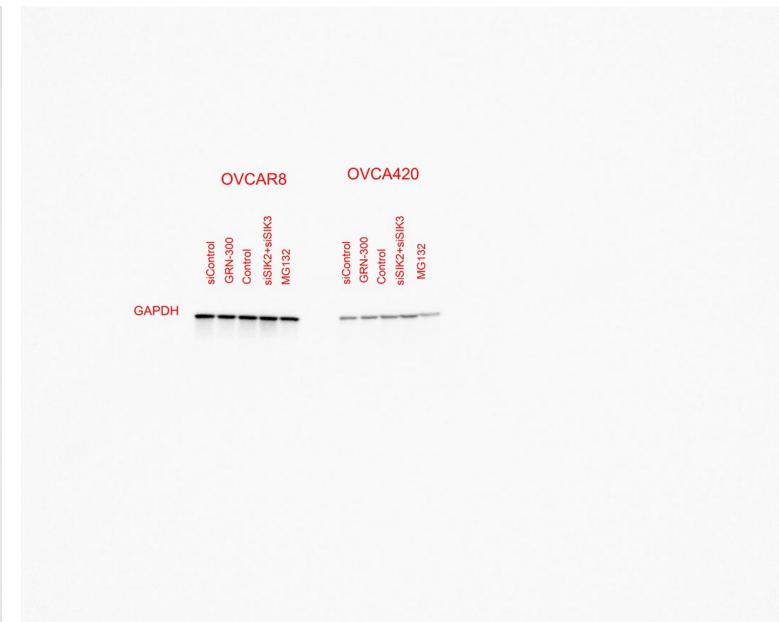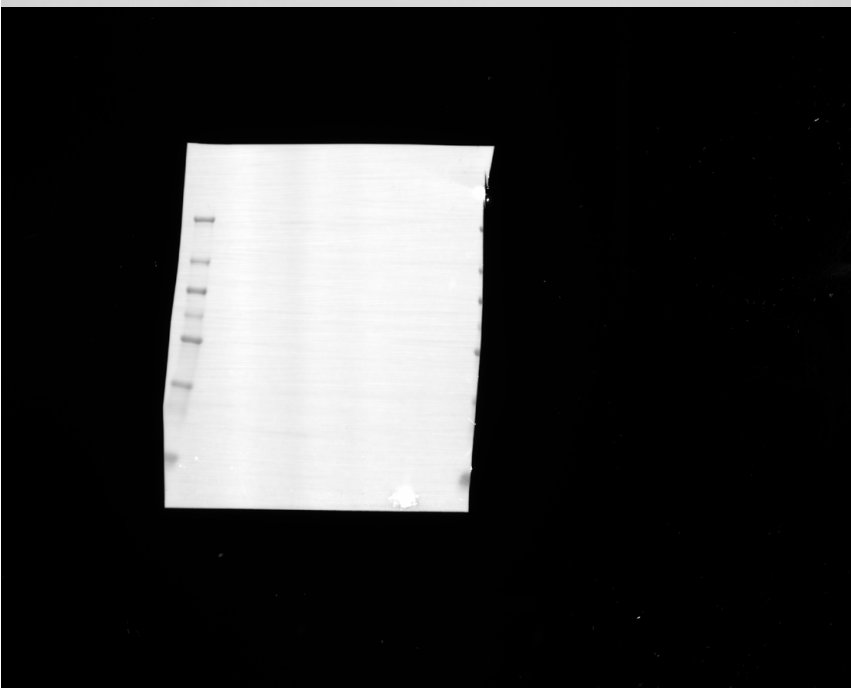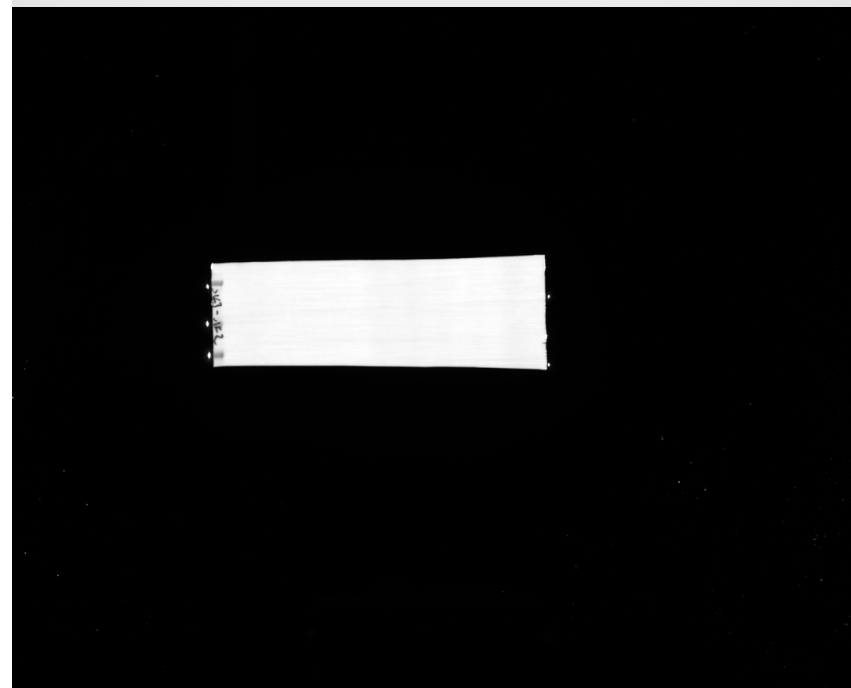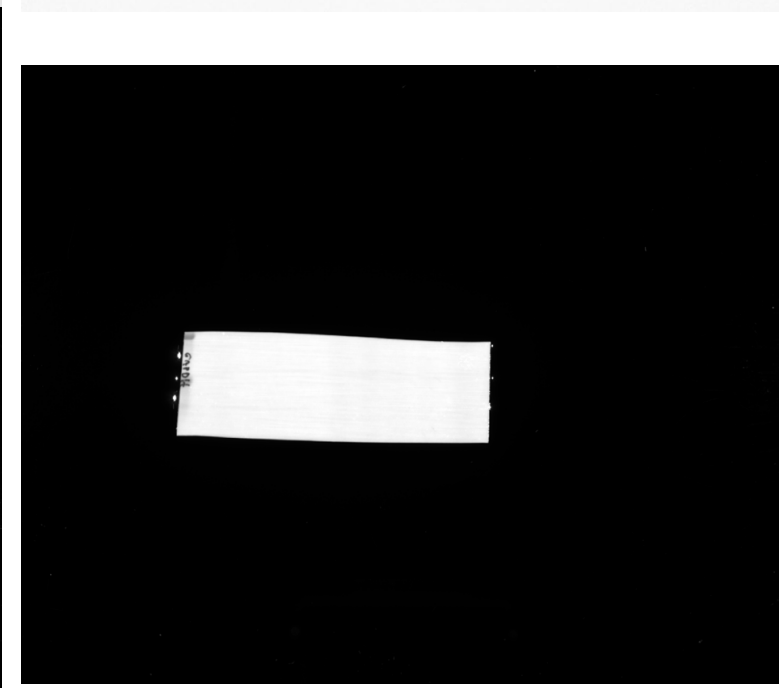



**Fig 1H (2/2)**

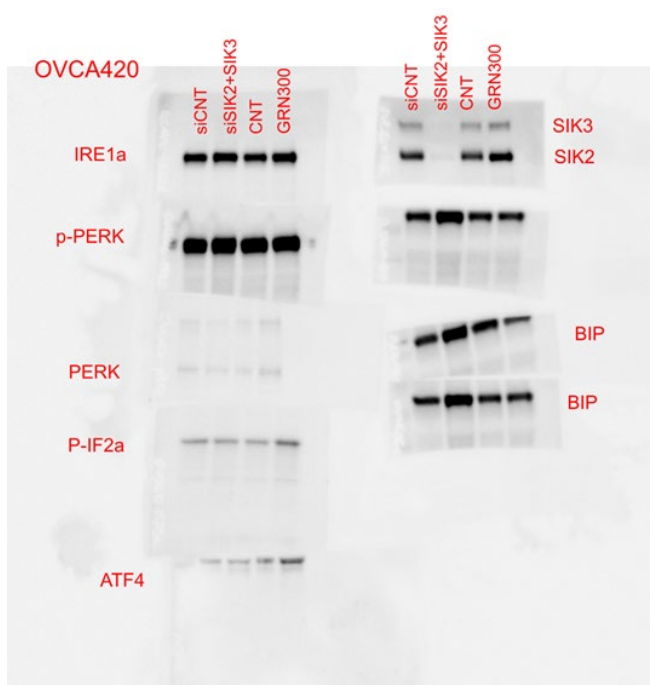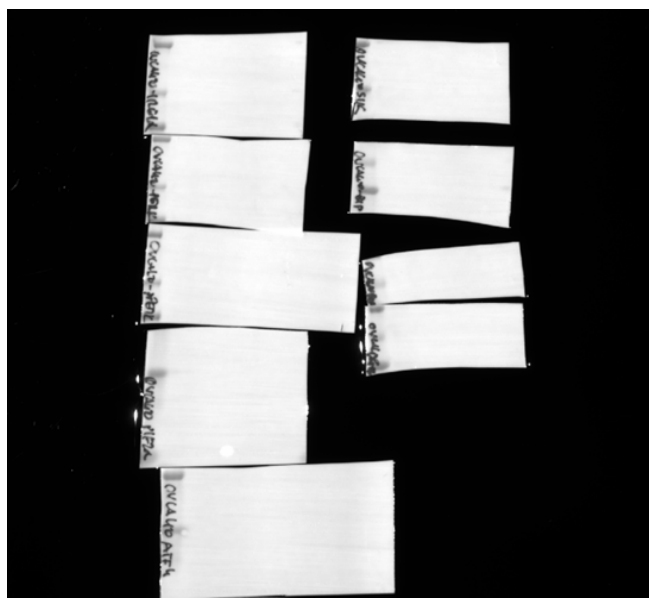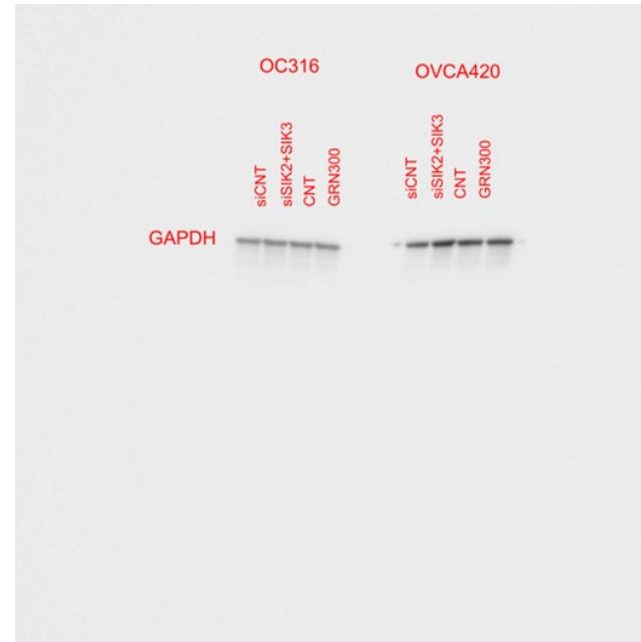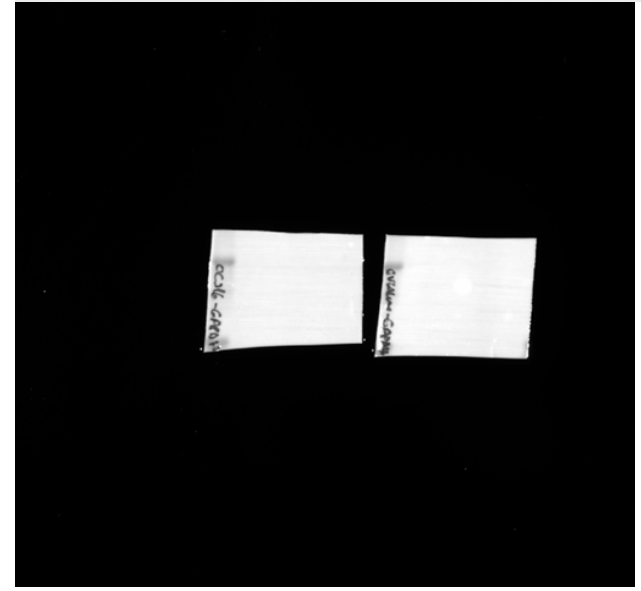

CHOP

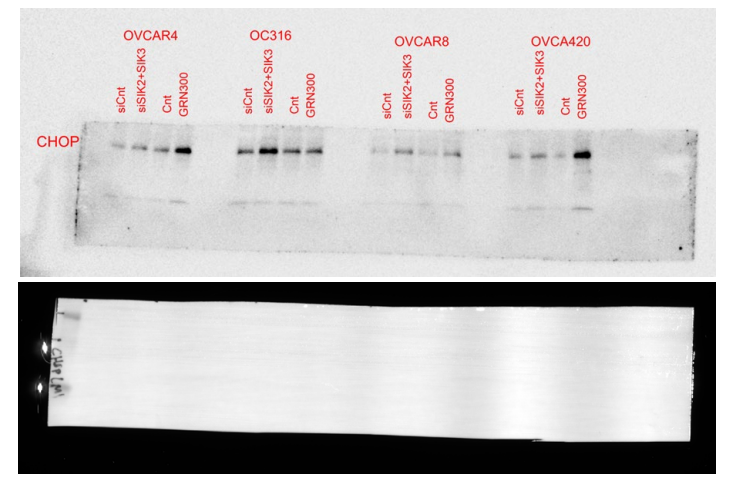

GAPDH-2

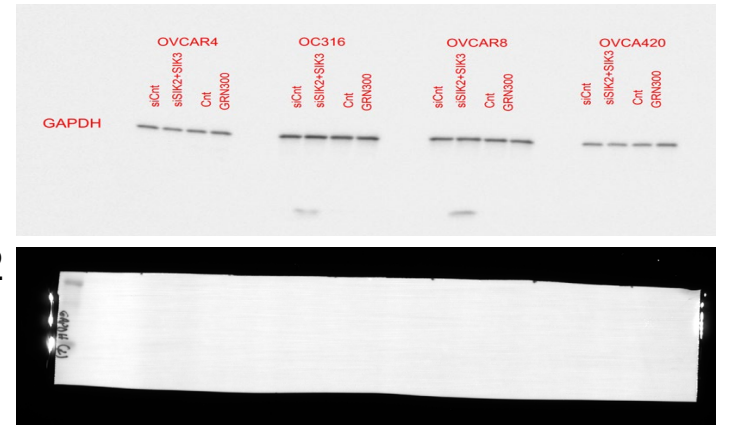

ATF6

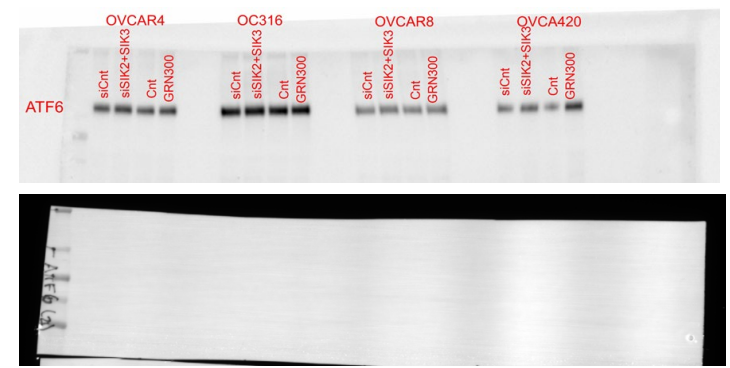

Fig 2E (1/2)

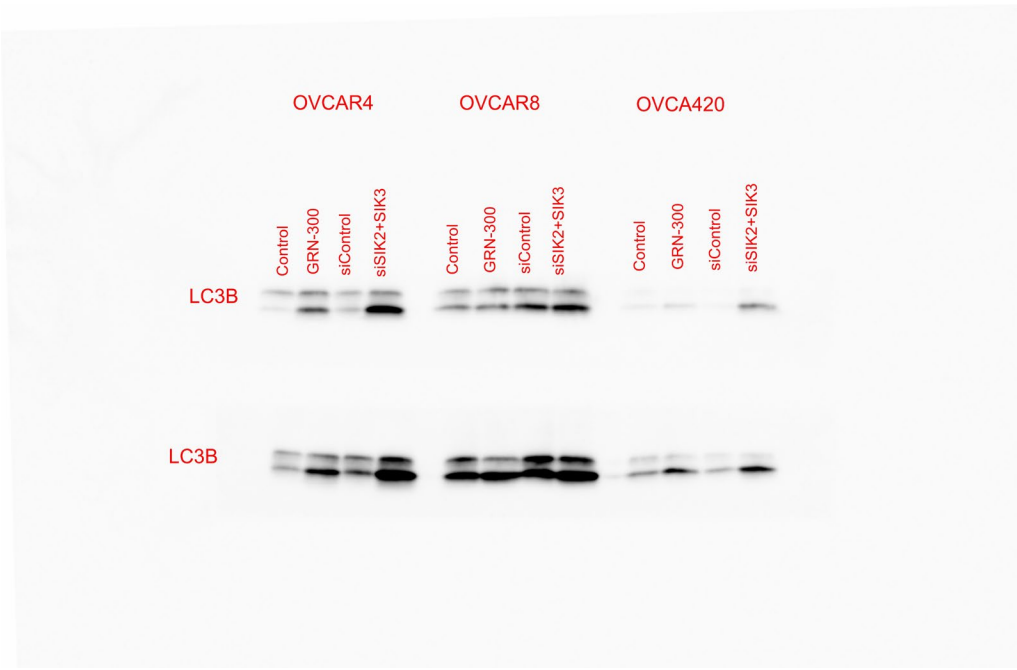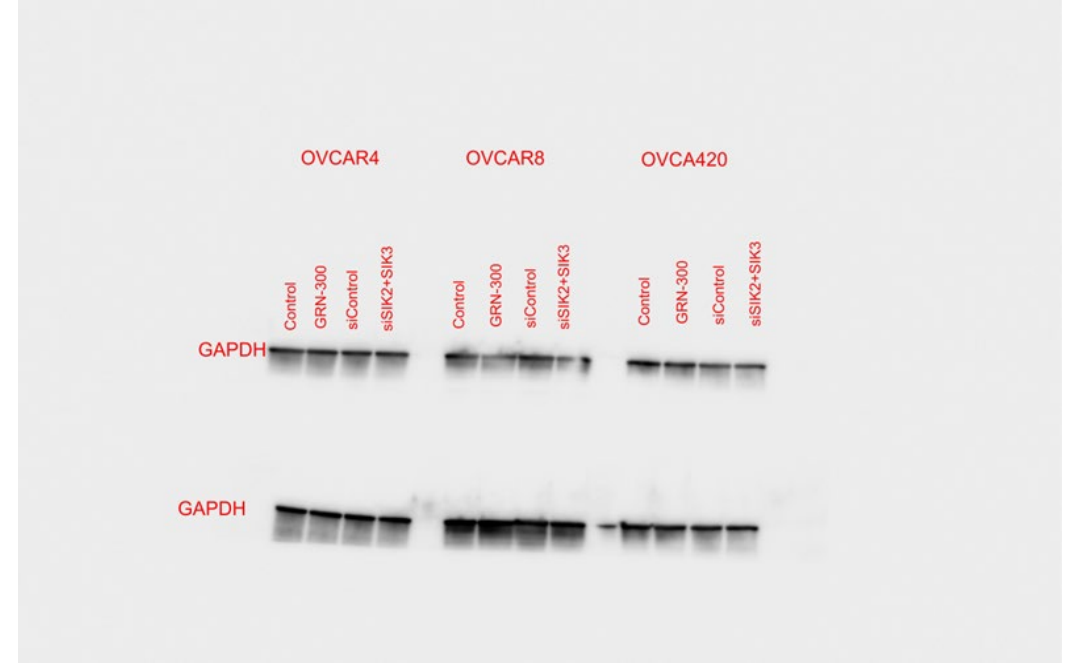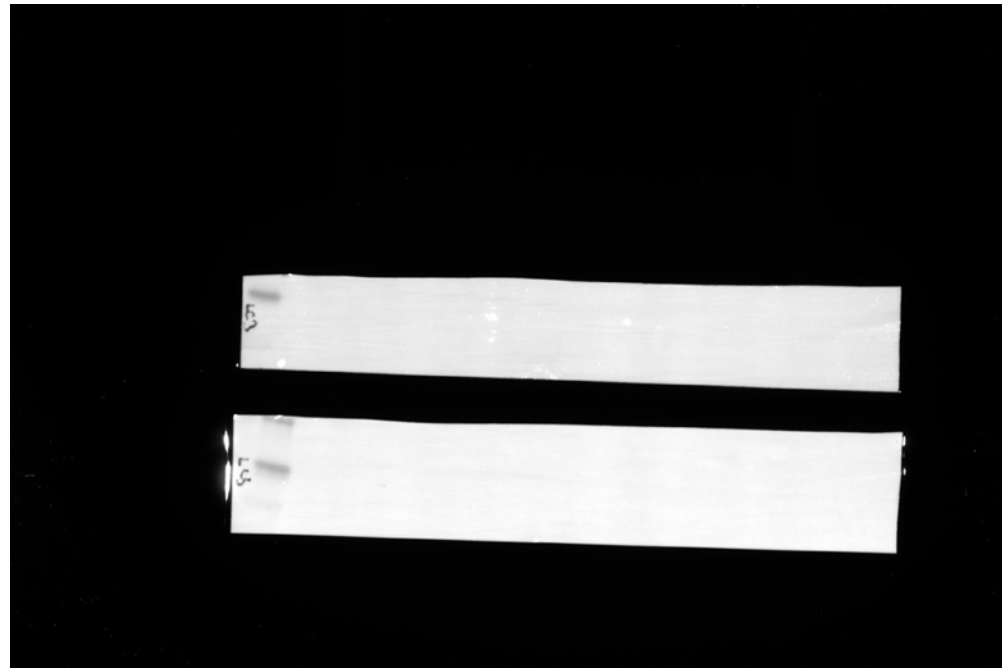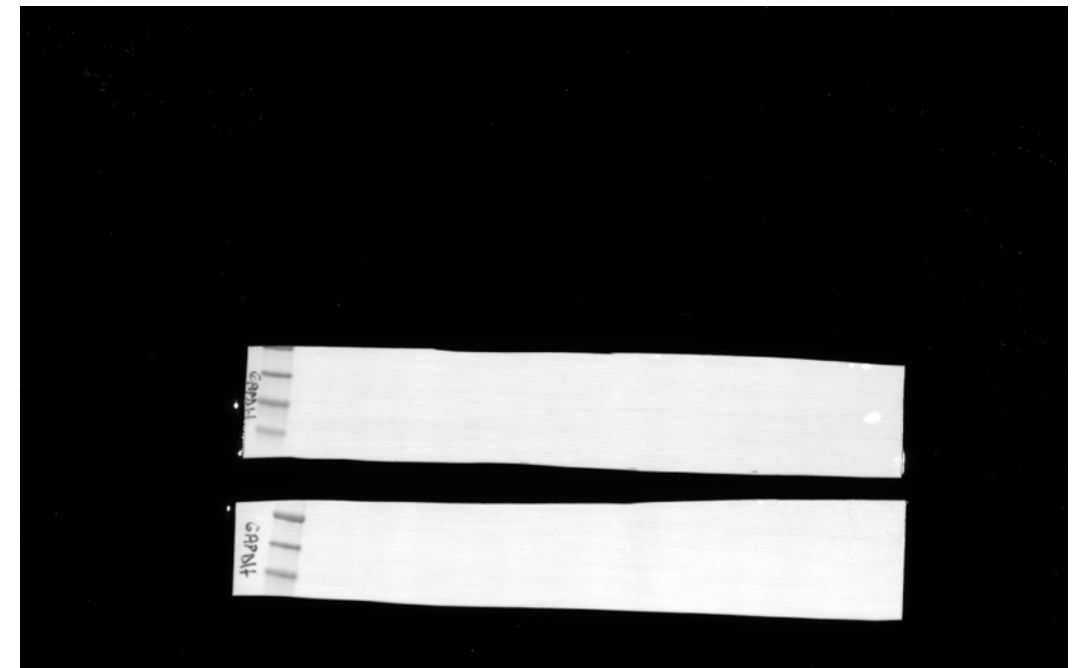

Fig 2E (2/2)

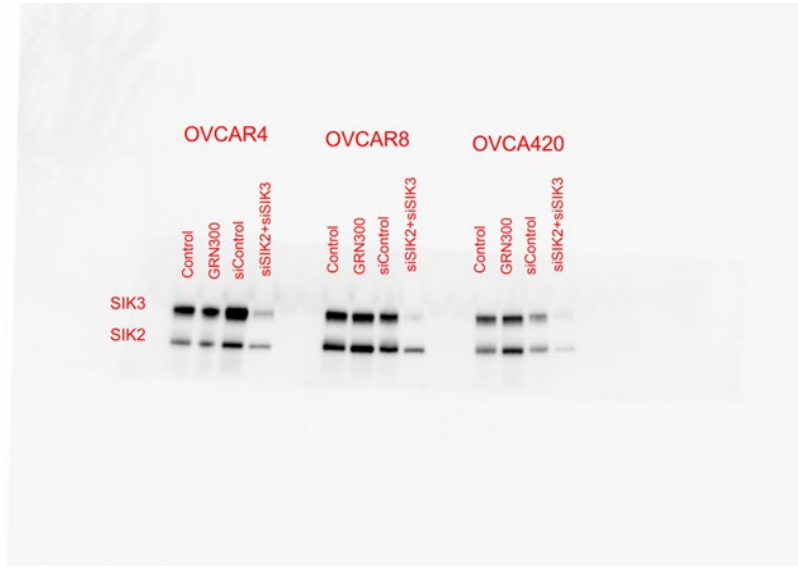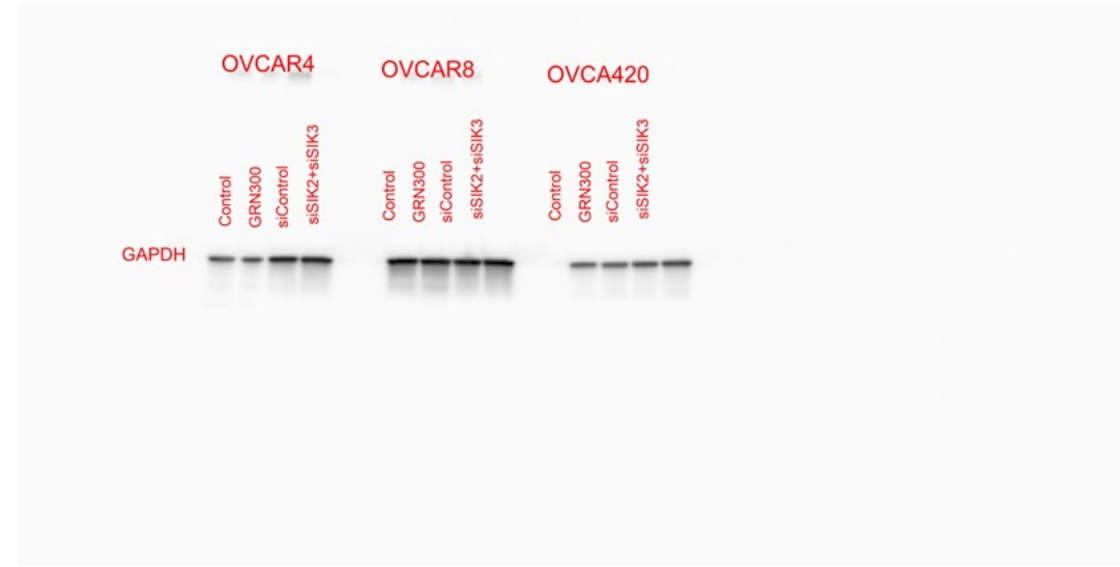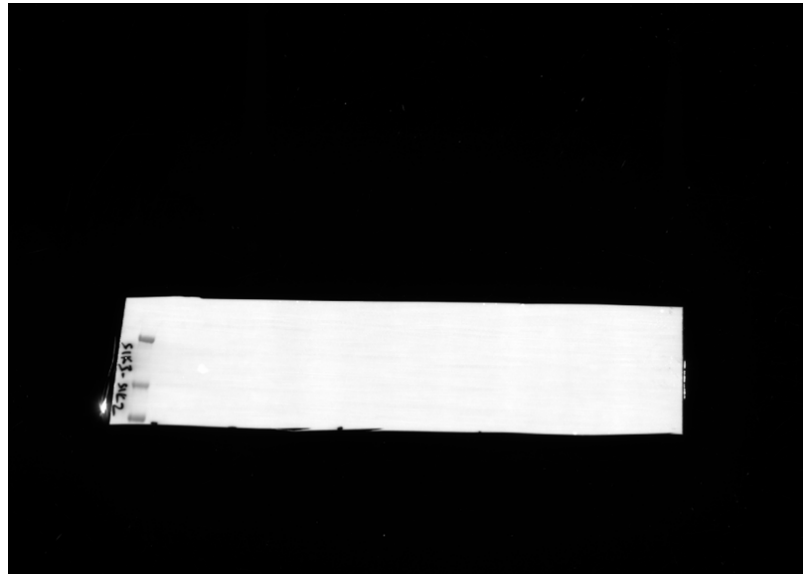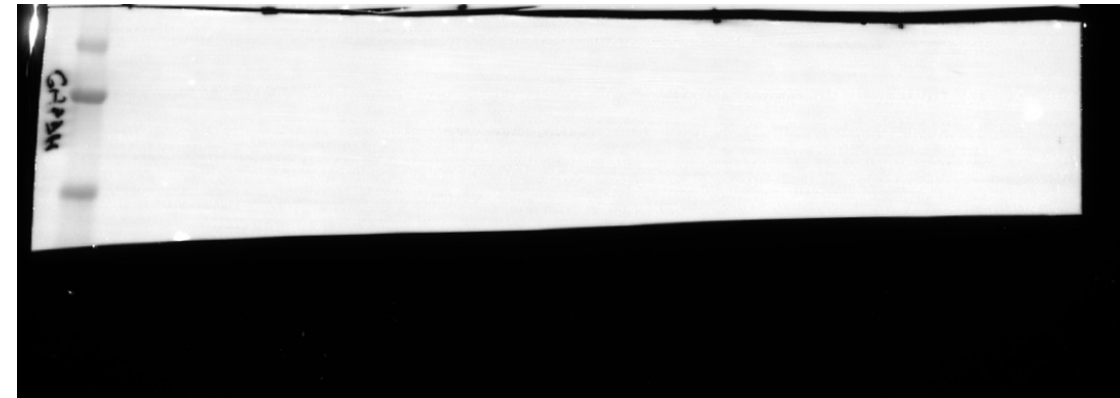

Fig 3C

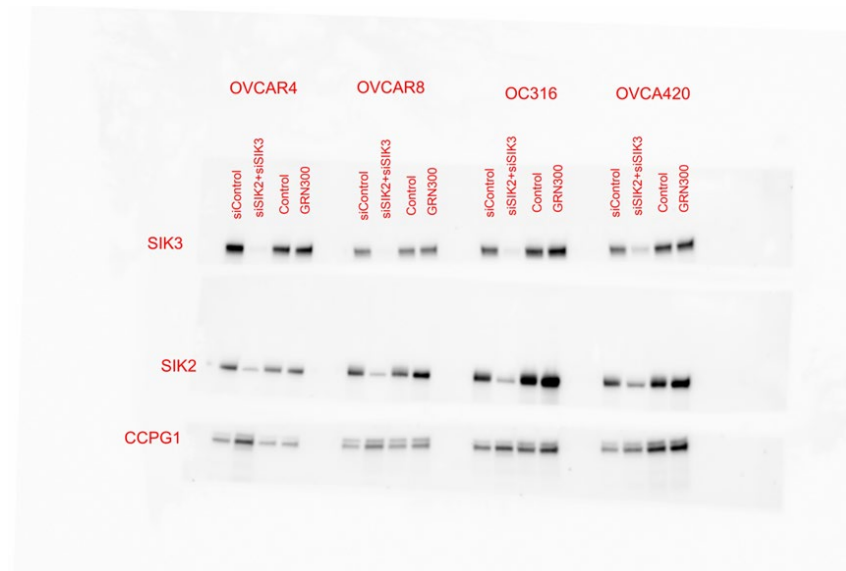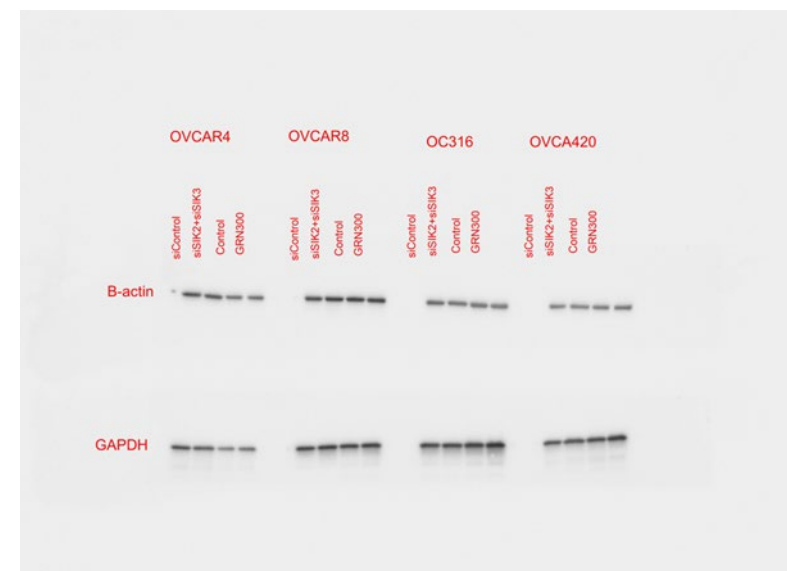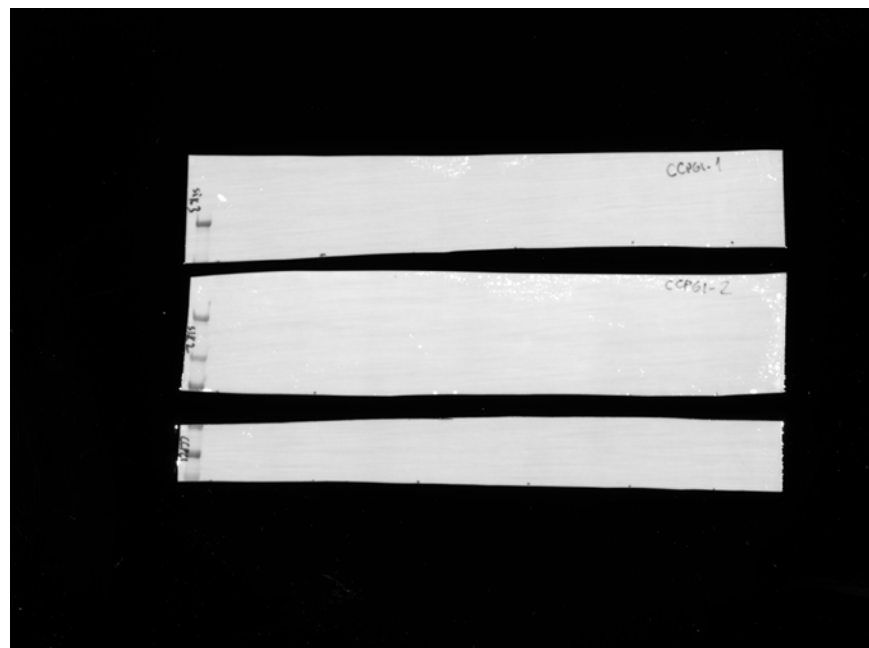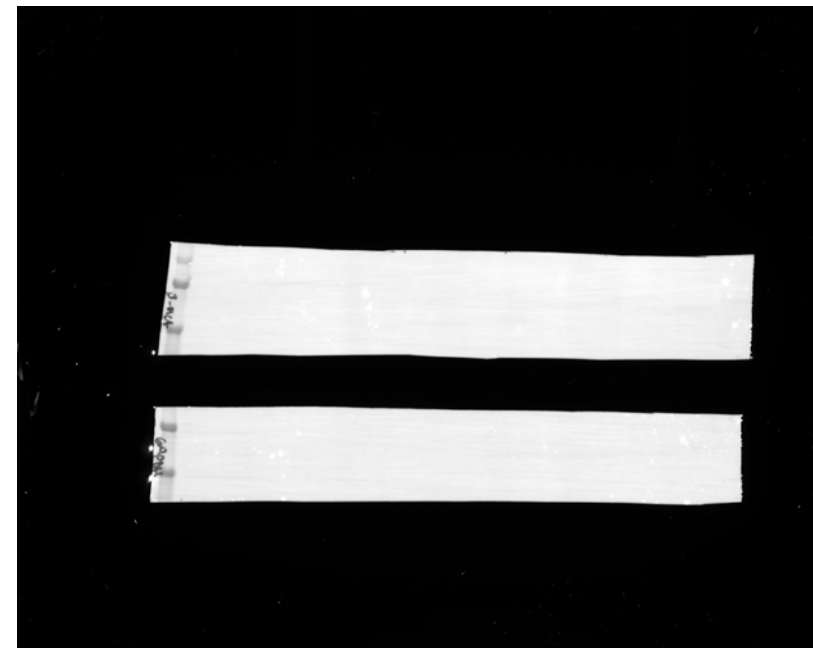

**Fig 3F**

CCPG1

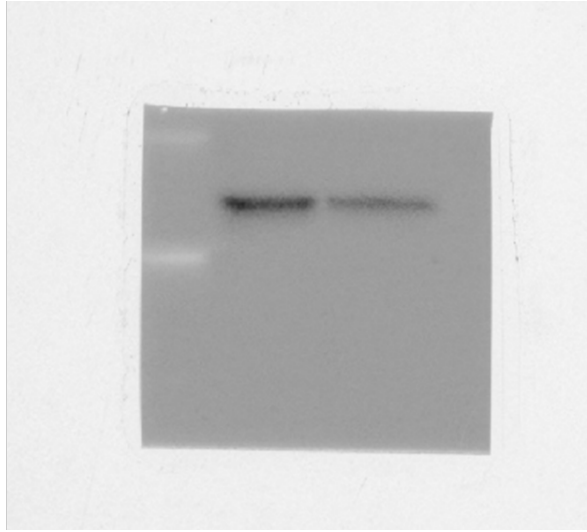

GAPDH

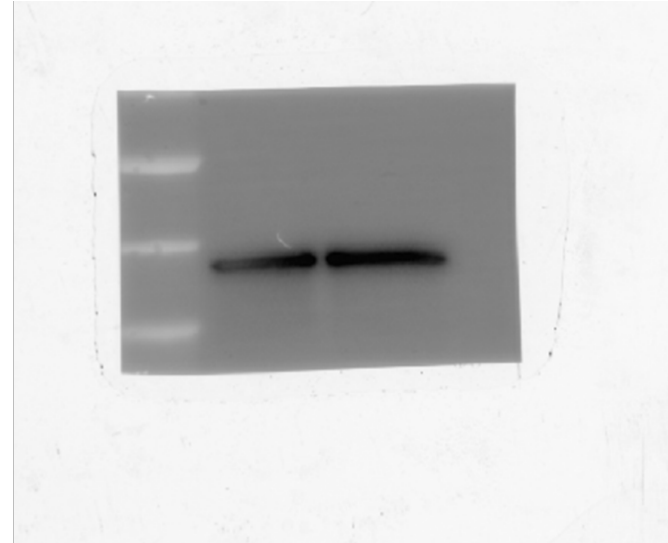

**Fig 3G (1/2)**

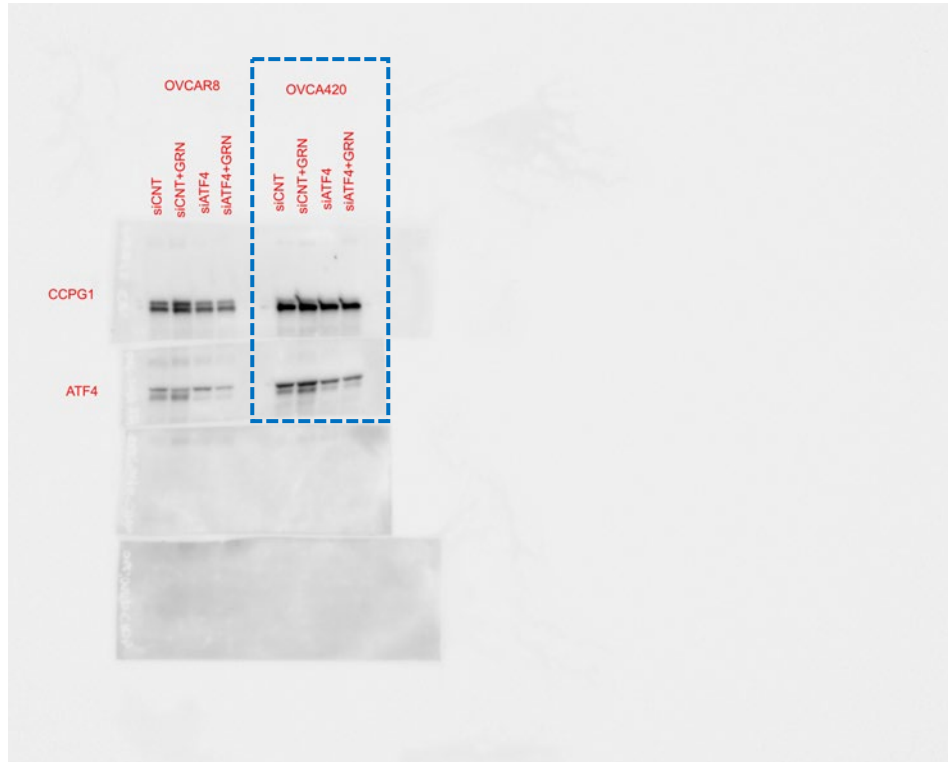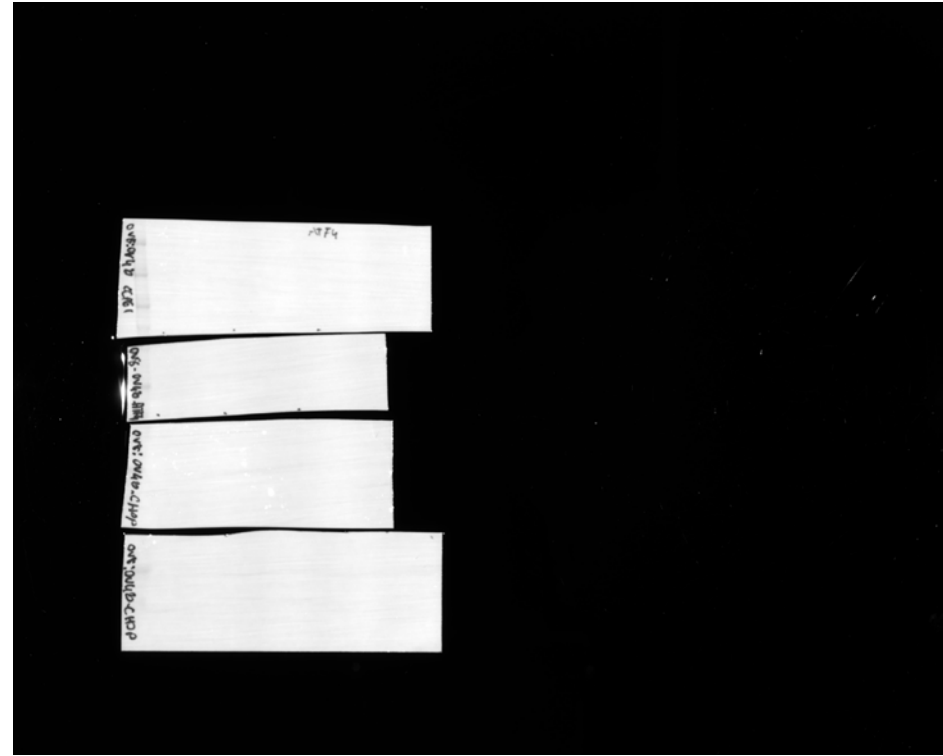

Uncropped western blot images corresponding to Figure 3G are shown. Lanes used in the main figure are indicated by blue boxes. Additional lanes represent unrelated samples/conditions not included in the final figure.

**Fig 3G (1/2)**

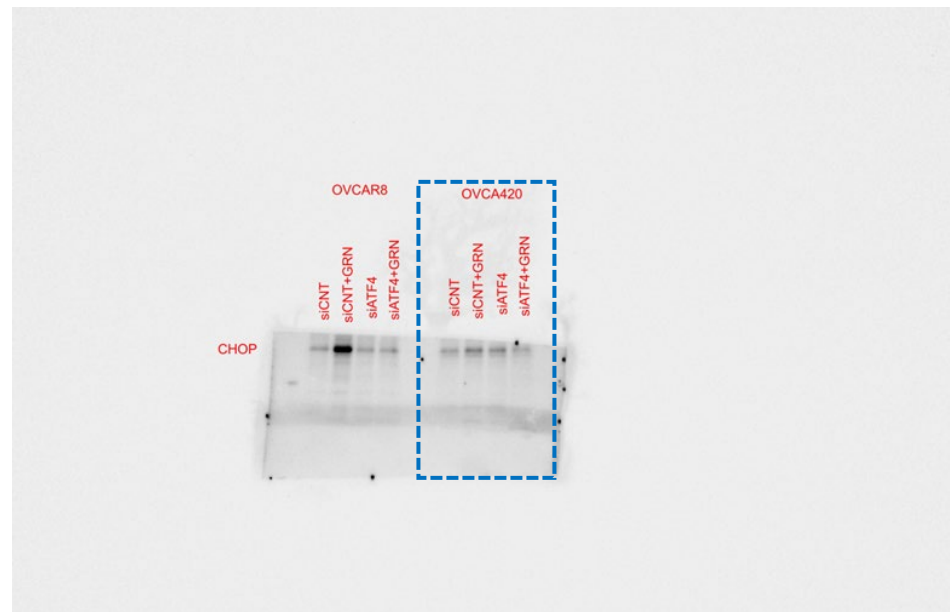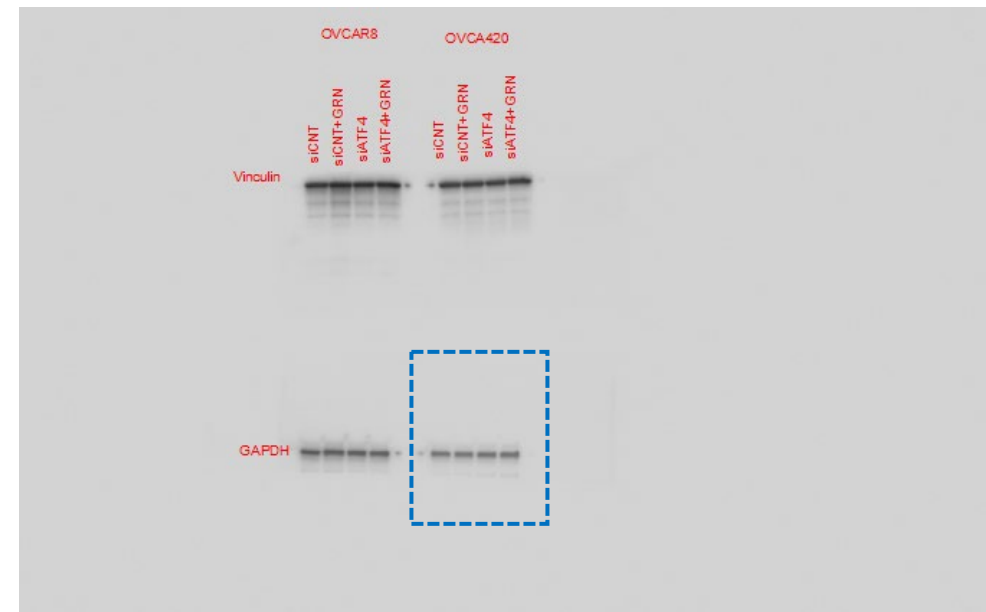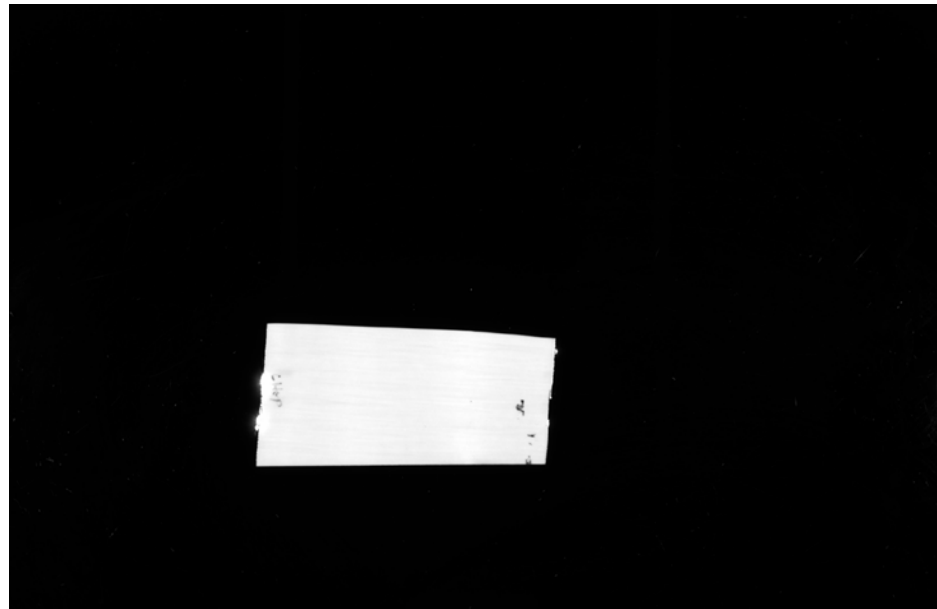

Uncropped western blot images corresponding to Figure 3G are shown. Lanes used in the main figure are indicated by blue boxes. Additional lanes represent unrelated samples/conditions not included in the final figure.

**Fig 6C**

OC316

cCasp3

siCNT  
GRN  
CQ  
Combo  
siCHOP  
siCHOP+Combo

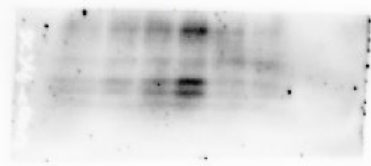

OC316

CHOP

siCNT  
GRN  
CQ  
Combo  
siCHOP  
siCHOP+Combo

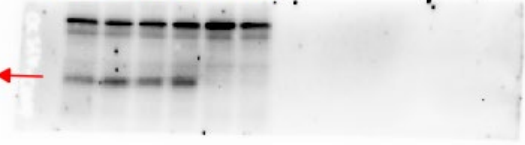

OC316

Vinculin

siCNT  
GRN  
CQ  
Combo  
siCHOP  
siCHOP+Combo

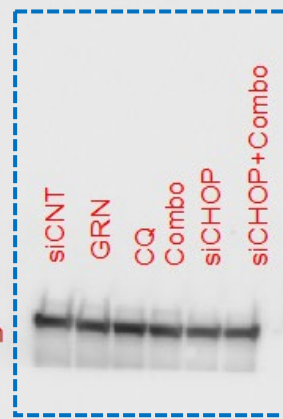

B-act

siCNT  
GRN  
CQ  
Combo  
siCHOP  
siCHOP+Combo

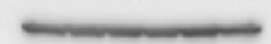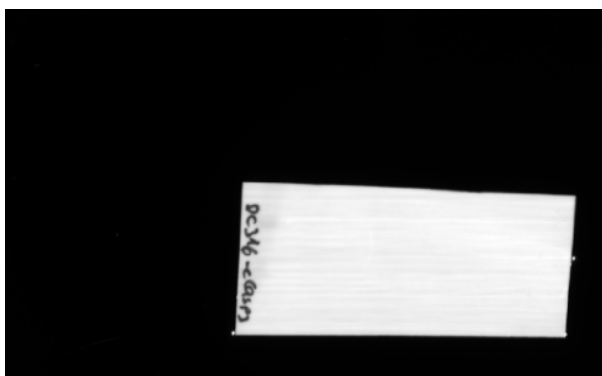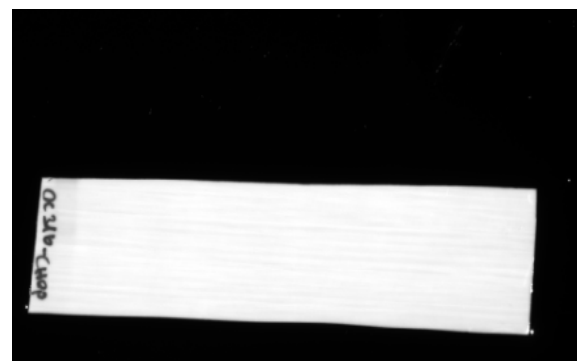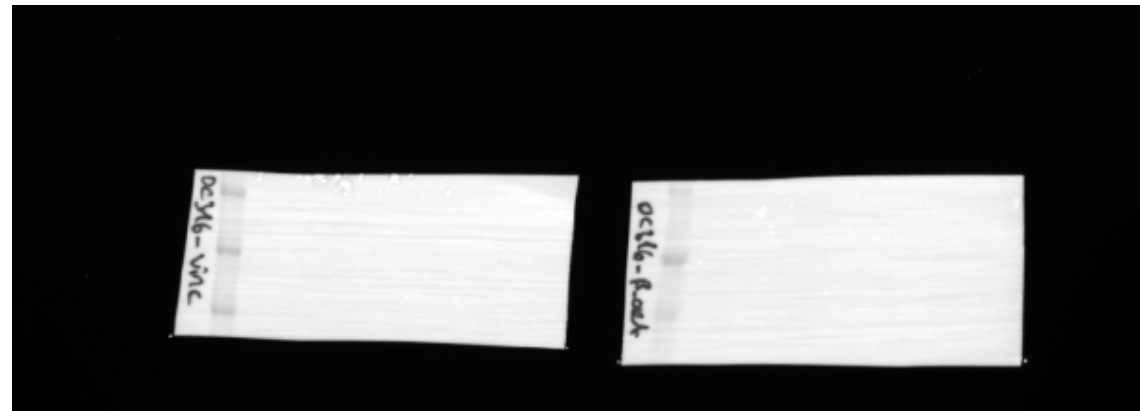

Uncropped western blot images corresponding to Figure 6C are shown. Lanes used in the main figure are indicated by blue boxes. Additional lanes represent unrelated samples/conditions not included in the final figure.

**Fig 6D (1/2)**

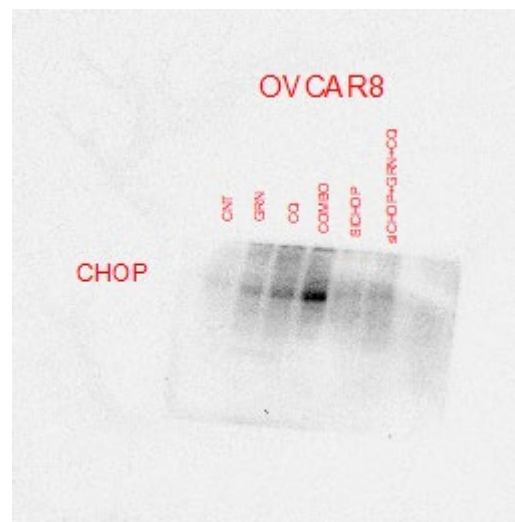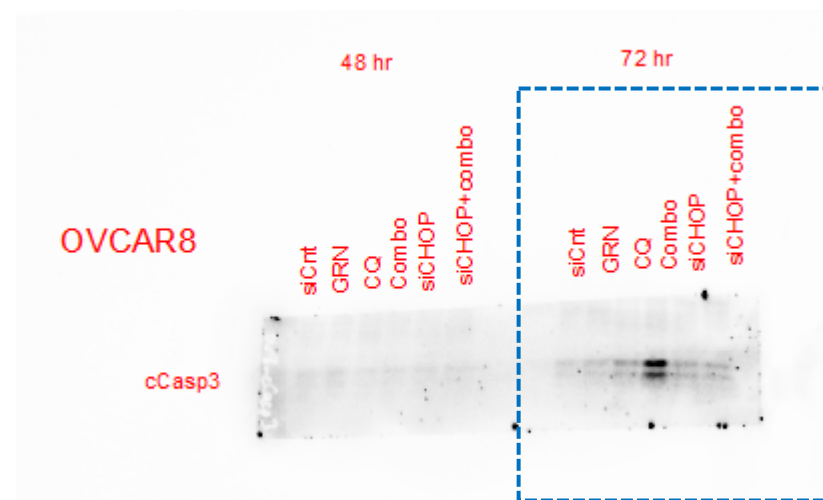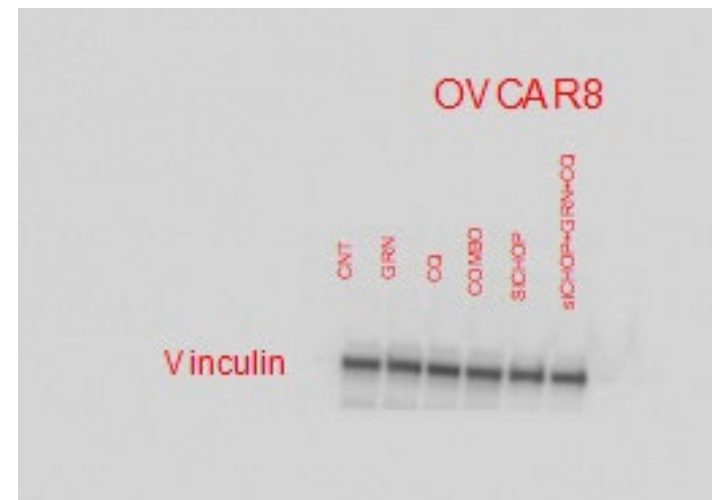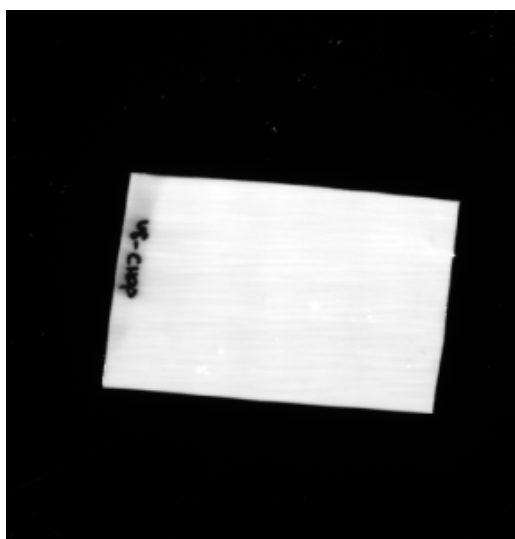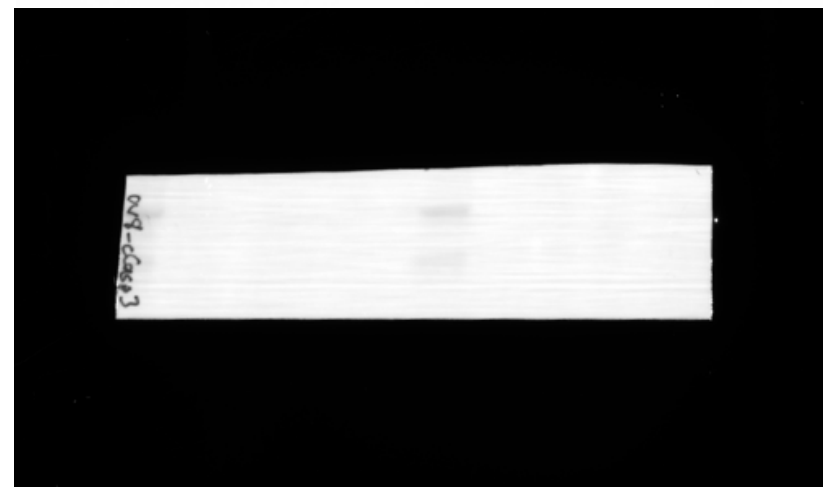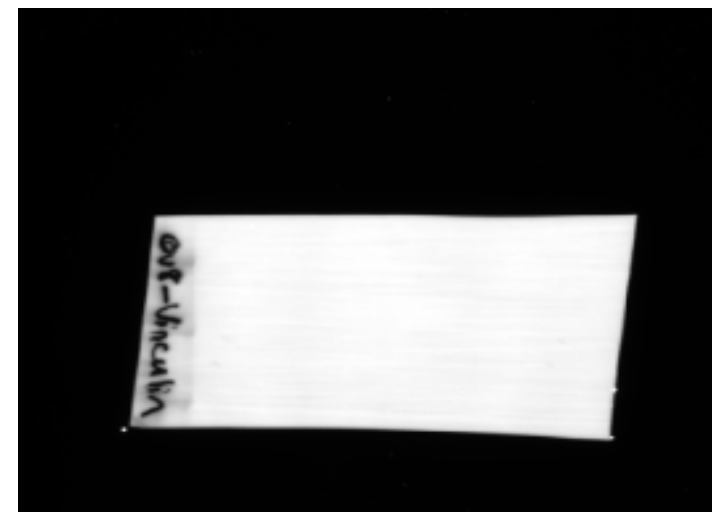

Uncropped western blot images corresponding to Figure 6D are shown. Lanes used in the main figure are indicated by blue boxes. Additional lanes represent unrelated samples/conditions not included in the final figure.

Fig 6D (2/2)

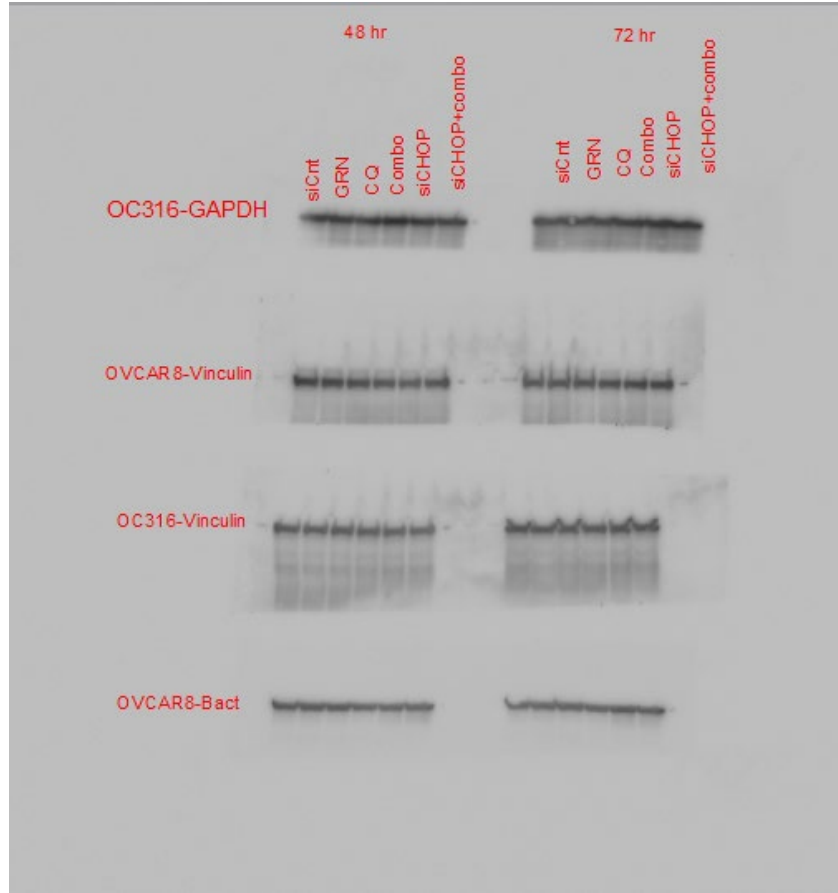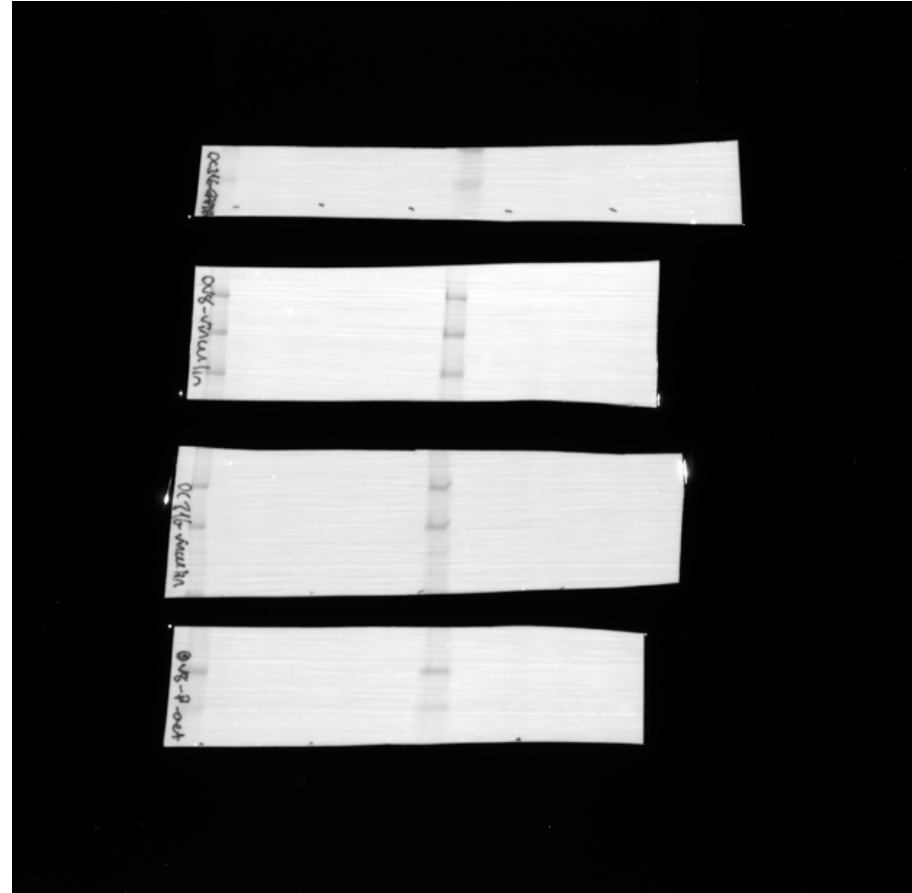

**Sup Fig 3B**

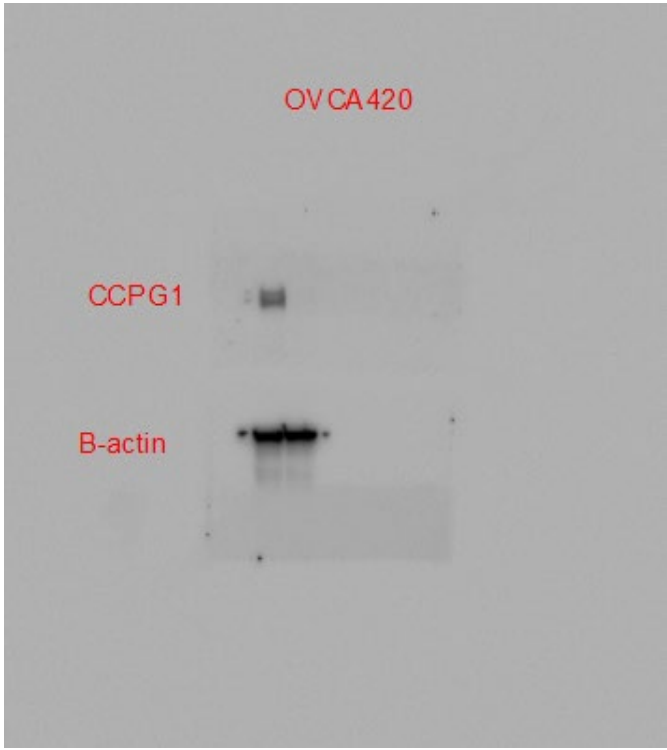

## Sup Fig 4B (1/2)

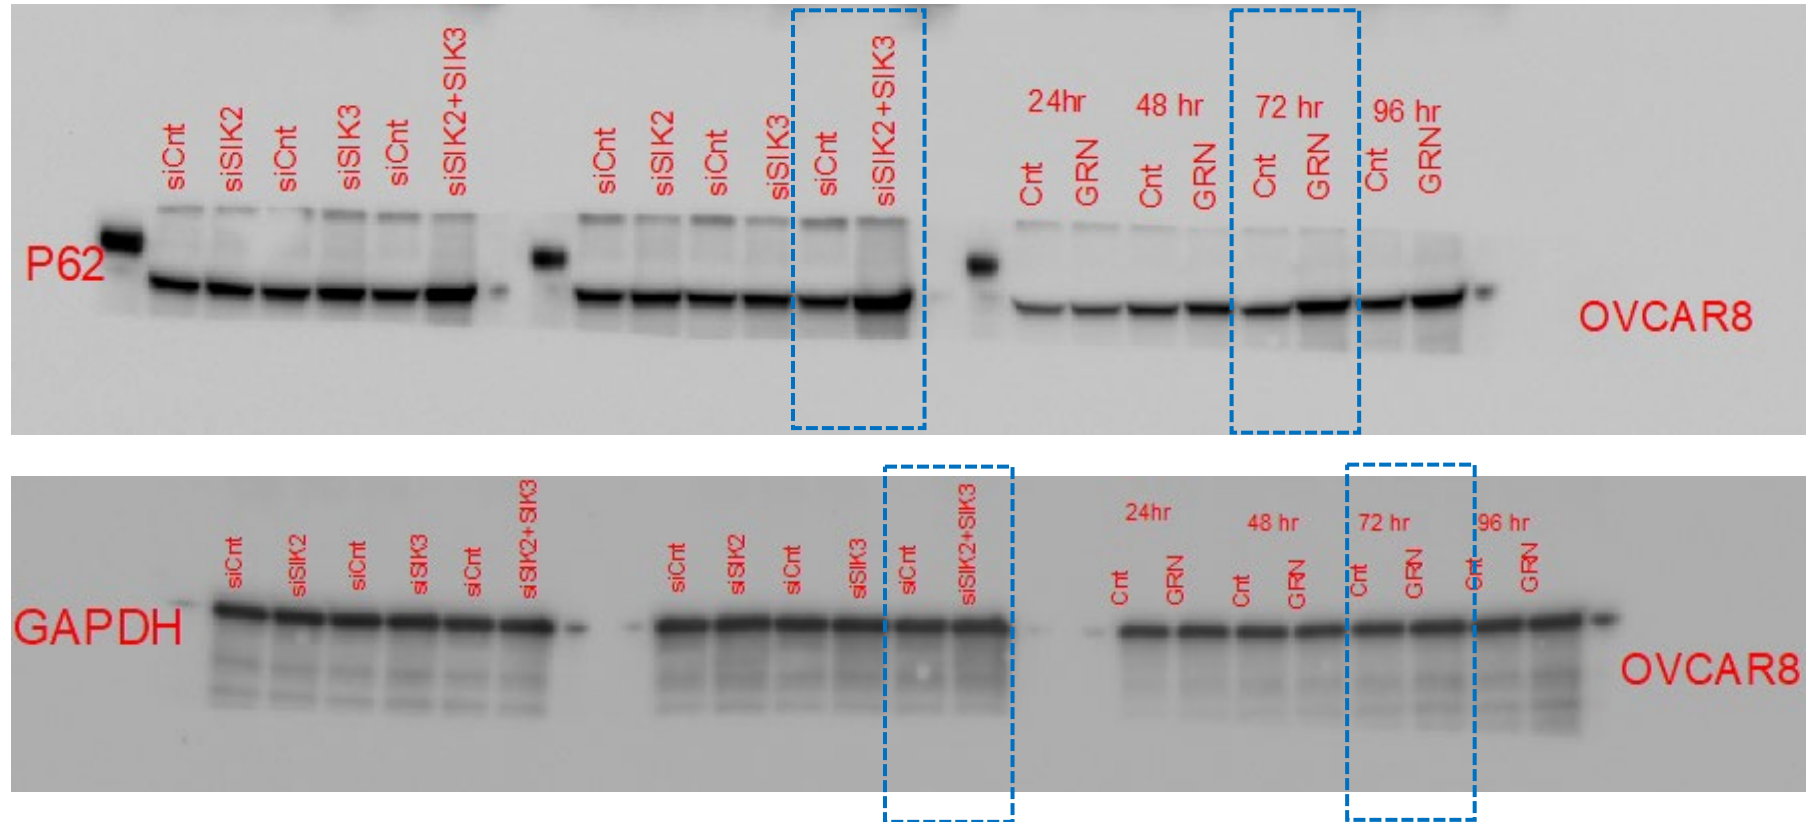

Uncropped western blot images corresponding to Supp Figure 4B are shown. Lanes used in the main figure are indicated by blue boxes. Additional lanes represent unrelated samples/conditions not included in the final figure.

## Sup Fig 4B (2/2)

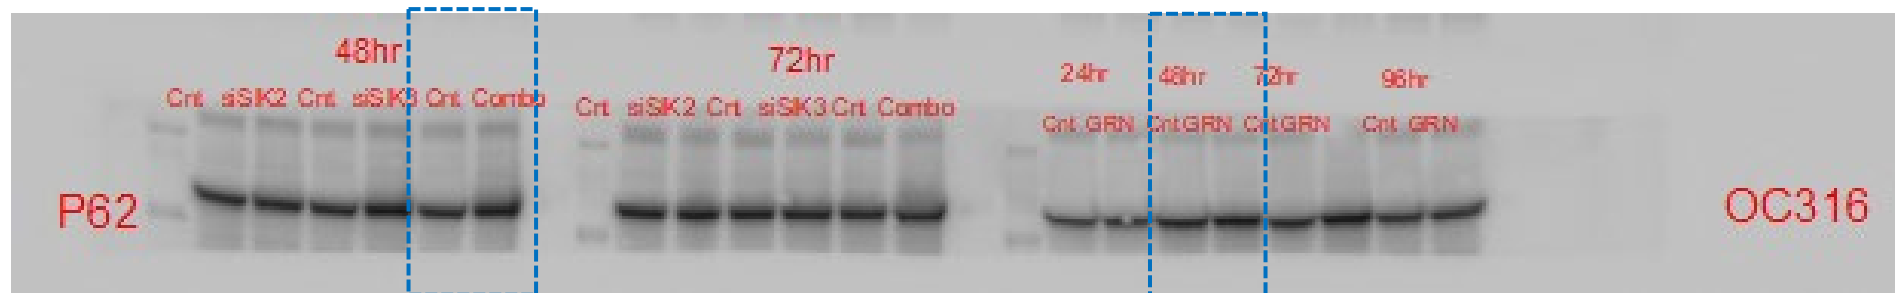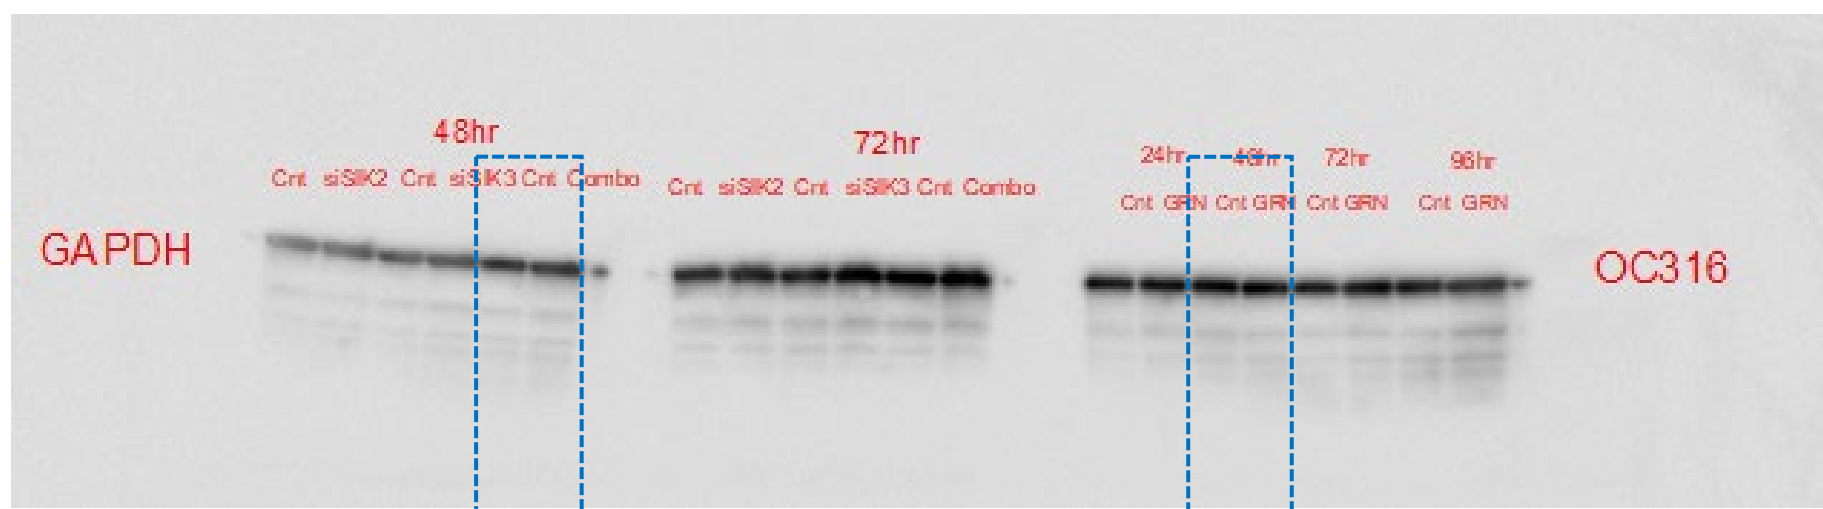

Uncropped western blot images corresponding to Supp Figure 4B are shown. Lanes used in the main figure are indicated by blue boxes. Additional lanes represent unrelated samples/conditions not included in the final figure.

**Sup Fig 4C**

p62

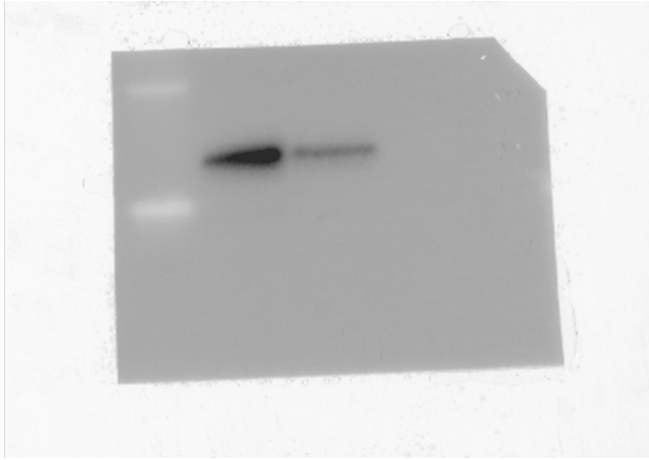

GAPDH

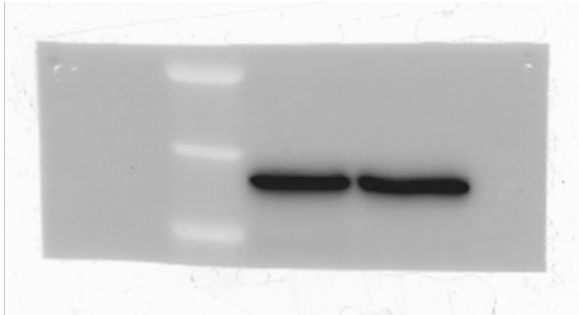

Sup Fig 5B

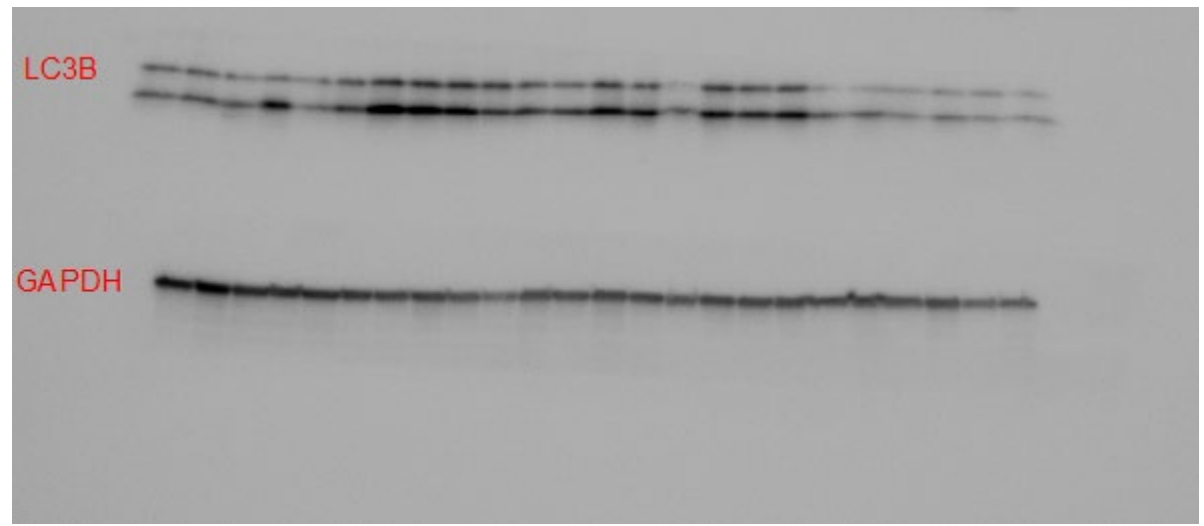

Supplement: Supplementary file 2 [file aae80b3333b30470dd33170a.pdf]
