# Supplementary material for: Inhibition of SIK2 and SIK3 induces adaptive ER-phagy and creates a therapeutic vulnerability in ovarian cancer
Source: Research Square preprint supplement (doi:10.21203/rs.3.rs-9933879/v1), 2026-07-01
Supplement: Supplementary file 2 [file 4153cabd3c2e29c53c2cff53.xlsx]

## Sheet: SF-3A_CCPG1_GRN
	Well	Fluor	Target	Content	Sample	Biological Set Name	Cq	Starting Quantity (SQ)	Log Starting Quantity	SQ Mean	SQ Std. Dev	Set Point	Well Note
	B01	SYBR	CCPG1	Unkn	OC316/CTRL/48h		26.6733				0	60
	B02	SYBR	CCPG1	Unkn			26.7284				0	60
	B03	SYBR	CCPG1	Unkn			26.6176				0	60
	B04	SYBR	CCPG1	Unkn	OC316/GRN2uM/48h		26.123				0	60
	B05	SYBR	CCPG1	Unkn			25.9802				0	60
	B06	SYBR	CCPG1	Unkn			25.9917				0	60
	D07	SYBR	CCPG1	Unkn	OVCAR8/CTRL/72h		25.8722				0	60
	D08	SYBR	CCPG1	Unkn			25.7224				0	60
	D09	SYBR	CCPG1	Unkn			25.7729				0	60
	D10	SYBR	CCPG1	Unkn	OVCAR8/GRN2uM/72h		25.5069				0	60
	D11	SYBR	CCPG1	Unkn			25.5368				0	60
	D12	SYBR	CCPG1	Unkn			25.6327				0	60
	F01	SYBR	GAPDH	Unkn	OC316/CTRL/48h		18.4946				0	60
	F02	SYBR	GAPDH	Unkn			19.1712				0	60
	F03	SYBR	GAPDH	Unkn			18.7681				0	60
	F04	SYBR	GAPDH	Unkn	OC316/GRN2uM/48h		19.2695				0	60
	F05	SYBR	GAPDH	Unkn			19.3215				0	60
	F06	SYBR	GAPDH	Unkn			19.1738				0	60
	H01	SYBR	GAPDH	Unkn	OVCAR8/CTRL/48h		18.0435				0	60
	H02	SYBR	GAPDH	Unkn			18.0997				0	60
	H03	SYBR	GAPDH	Unkn			18.0348				0	60
	H04	SYBR	GAPDH	Unkn	OVCAR8/GRN2uM/48h		18.0459				0	60
	H05	SYBR	GAPDH	Unkn			17.8067				0	60
	H06	SYBR	GAPDH	Unkn			17.851				0	60

## Sheet: SF-4A_p62_GRN
	Well	Fluor	Target	Content	Sample	Biological Set Name	Cq	Starting Quantity (SQ)	Log Starting Quantity	SQ Mean	SQ Std. Dev	Set Point	Well Note
	B01	SYBR	P62	Unkn	OC316/CTRL/48h		21.2886				0	60
	B02	SYBR	P62	Unkn			21.216				0	60
	B03	SYBR	P62	Unkn			21.3698				0	60
	B04	SYBR	P62	Unkn	OC316/GRN2uM/48h		20.4552				0	60
	B05	SYBR	P62	Unkn			20.1305				0	60
	B06	SYBR	P62	Unkn			20.1773				0	60
	D07	SYBR	P62	Unkn	OVCAR8/CTRL/72h		21.5623				0	60
	D08	SYBR	P62	Unkn			21.2074				0	60
	D09	SYBR	P62	Unkn			21.4221				0	60
	D10	SYBR	P62	Unkn	OVCAR8/GRN2uM/72h		20.1345				0	60
	D11	SYBR	P62	Unkn			20.0546				0	60
	D12	SYBR	P62	Unkn			20.1653				0	60
	F01	SYBR	GAPDH	Unkn	OC316/CTRL/48h		18.4946				0	60
	F02	SYBR	GAPDH	Unkn			19.1712				0	60
	F03	SYBR	GAPDH	Unkn			18.7681				0	60
	F04	SYBR	GAPDH	Unkn	OC316/GRN2uM/48h		19.2695				0	60
	F05	SYBR	GAPDH	Unkn			19.3215				0	60
	F06	SYBR	GAPDH	Unkn			19.1738				0	60
	H07	SYBR	GAPDH	Unkn	OVCAR8/CTRL/72h		17.8434				0	60
	H08	SYBR	GAPDH	Unkn			17.8917				0	60
	H09	SYBR	GAPDH	Unkn			17.7613				0	60
	H10	SYBR	GAPDH	Unkn	OVCAR8/GRN2uM/72h		17.9998				0	60
	H11	SYBR	GAPDH	Unkn			18.2612				0	60
	H12	SYBR	GAPDH	Unkn			17.9874				0	60

## Sheet: SF-3A-4A-CCPG1_p62_SIK2-3
	Well	Fluor	Target	Content	Sample	Biological Set Name	Cq	Starting Quantity (SQ)	Log Starting Quantity	SQ Mean	SQ Std. Dev	Set Point	Well Note
	C07	SYBR	CCPG1	Unkn	OC316/siCTRL		26.932				0	60
	C08	SYBR	CCPG1	Unkn			26.9068				0	60
	C09	SYBR	CCPG1	Unkn			26.8386				0	60
	C10	SYBR	CCPG1	Unkn	OC316/siK2+siK3		26.6064				0	60
	C11	SYBR	CCPG1	Unkn			26.4797				0	60
	C12	SYBR	CCPG1	Unkn			26.3565				0	60
	D07	SYBR	CCPG1	Unkn	OVCAR8/siCTRL		27.1168				0	60
	D08	SYBR	CCPG1	Unkn			27.1765				0	60
	D09	SYBR	CCPG1	Unkn			27.0842				0	60
	D10	SYBR	CCPG1	Unkn	OVCAR8/siK2+siK3		25.1622				0	60
	D11	SYBR	CCPG1	Unkn			25.0526				0	60
	D12	SYBR	CCPG1	Unkn			25.0374				0	60
	G07	SYBR	P62	Unkn	OC316/siCTRL		22.3699				0	60
	G08	SYBR	P62	Unkn			22.1795				0	60
	G09	SYBR	P62	Unkn			22.1259				0	60
	G10	SYBR	P62	Unkn	OC316/siK2+siK3		22.0814				0	60
	G11	SYBR	P62	Unkn			21.9997				0	60
	G12	SYBR	P62	Unkn			22.1137				0	60
	H07	SYBR	P62	Unkn	OVCAR8/siCTRL		21.8731				0	60
	H08	SYBR	P62	Unkn			22.1395				0	60
	H09	SYBR	P62	Unkn			22.0699				0	60
	H10	SYBR	P62	Unkn	OVCAR8/siK2+siK3		20.8337				0	60
	H11	SYBR	P62	Unkn			21.0263				0	60
	H12	SYBR	P62	Unkn			20.9141				0	60
	G07	SYBR	GAPDH	Unkn	OC316/siCTRL		20.7985
	G08	SYBR	GAPDH	Unkn			20.5033
	G09	SYBR	GAPDH	Unkn			20.5774
	G10	SYBR	GAPDH	Unkn	OC316/siK2+siK3		20.4791
	G11	SYBR	GAPDH	Unkn			20.6604
	G12	SYBR	GAPDH	Unkn			20.506
	H07	SYBR	GAPDH	Unkn	OVCAR8/siCTRL		19.8575
	H08	SYBR	GAPDH	Unkn			19.5979
	H09	SYBR	GAPDH	Unkn			19.5984
	H10	SYBR	GAPDH	Unkn	OVCAR8/siK2+siK3		19.6901
	H11	SYBR	GAPDH	Unkn			20.005
	H12	SYBR	GAPDH	Unkn			19.9098
